# Supplementary material
Source: HighWire-hosted journal article supplement (https://jnm.snmjournals.org/highwire/filestream/94080/field_highwire_adjunct_files/0/066811_supplemental_materials.pdf)
Supplement: 066811_supplemental_materials.pdf [file 066811_supplemental_materials.pdf]

## Supplementary Figure 1

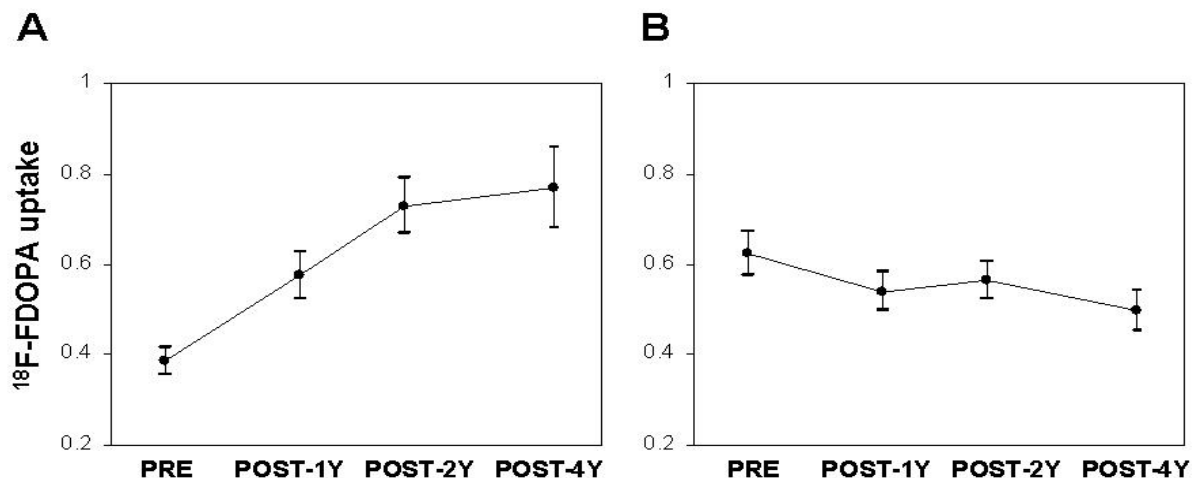

### Supplemental Figure Legend

Voxel-wise comparisons of  $^{18}\text{F}$ -FDOPA uptake with the striatum at one (POST-1Y), two (POST-2Y), and four (POST-4Y) years after transplantation with baseline scans (PRE). This analysis was performed in the 15 subjects who were scanned at all four time points. Transplantation resulted in increased  $^{18}\text{F}$ -FDOPA uptake in the posterior putamen as well as concurrent bilateral reductions in the non-grafted caudate and ventrostrual putamen ( $p < 0.001$ ; RMANOVA). (A) *Post-hoc* analysis revealed progressive increases in the posterior putamen (coordinates: -28 -6 0 mm). (B) Significant decreases in  $^{18}\text{F}$ -FDOPA uptake were detected in the ventrostrual putamen (coordinates: 12 18 -8 mm). [The data in the plots were generated from spherical volumes of interest (4 mm radius) centered at the peak coordinates from the voxel-based analysis (see text)].

Supplemental Table. Results of three-way RMANOVA of the clinical outcome data

| Effect                 | From baseline to one year |        | From baseline to two years |         |
|------------------------|---------------------------|--------|----------------------------|---------|
|                        | F                         | P      | F                          | P       |
| <b>Time</b>            | 11.42                     | <0.003 | 13.82                      | <0.0001 |
| <b>Age</b>             | 0.58                      | 0.451  | 1.62                       | 0.213   |
| <b>Gender</b>          | 0.64                      | 0.431  | 0.30                       | 0.585   |
| <b>Time×Age</b>        | 4.80                      | 0.037* | 2.94                       | 0.062   |
| <b>Time×Gender</b>     | 4.39                      | 0.045* | 1.97                       | 0.149   |
| <b>Age×Gender</b>      | 0.45                      | 0.508  | 0.25                       | 0.622   |
| <b>Time×Age×Gender</b> | 3.20                      | 0.084  | 1.35                       | 0.268   |

Data are the F- and p-values from three-way repeated measures analyses of variance (RMANOVA) of UPDRS motor scores at baseline and one and two years after transplantation.

\*p<0.05, three-way RMANOVA
